# Supplementary material for: DGA-functionalized super-magnetic acid-stable sorbent for treatment of acidic rich nuclear effluent
Source: Royal Society of Chemistry journal article supplement (doi:10.1039/d3nj02992a), 2023-01-01
Supplement: d3nj02992a1.pdf [file d3nj02992a1.pdf]

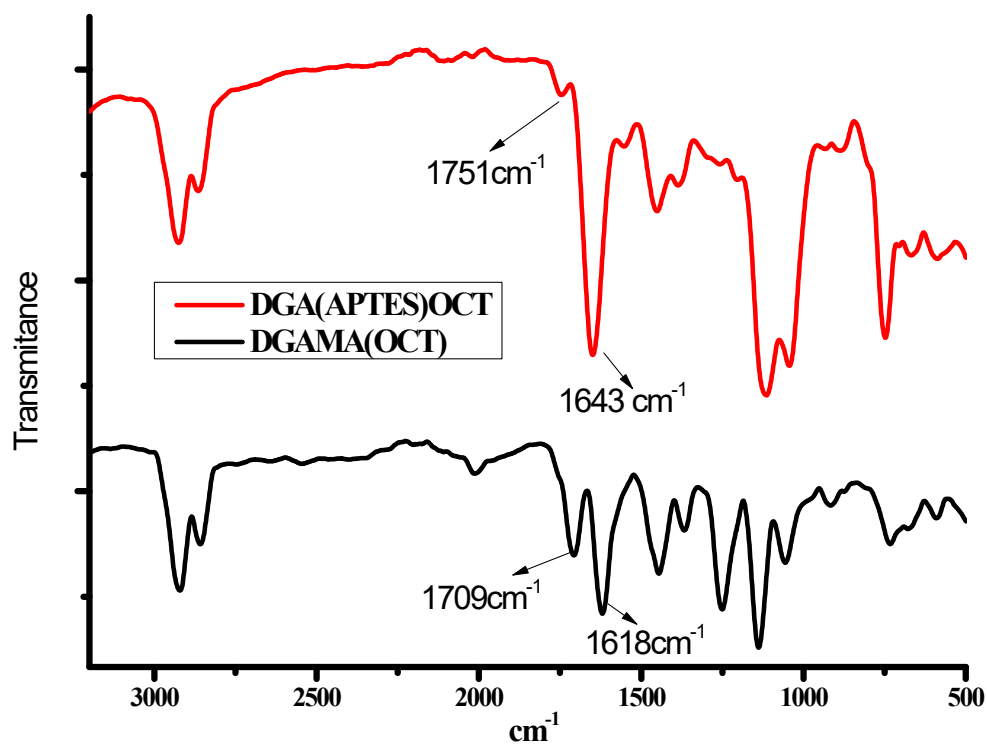

Fig. S1: ATR-FTIR spectrum of DGAMA-OCT & DGAMA-APTES-OCT

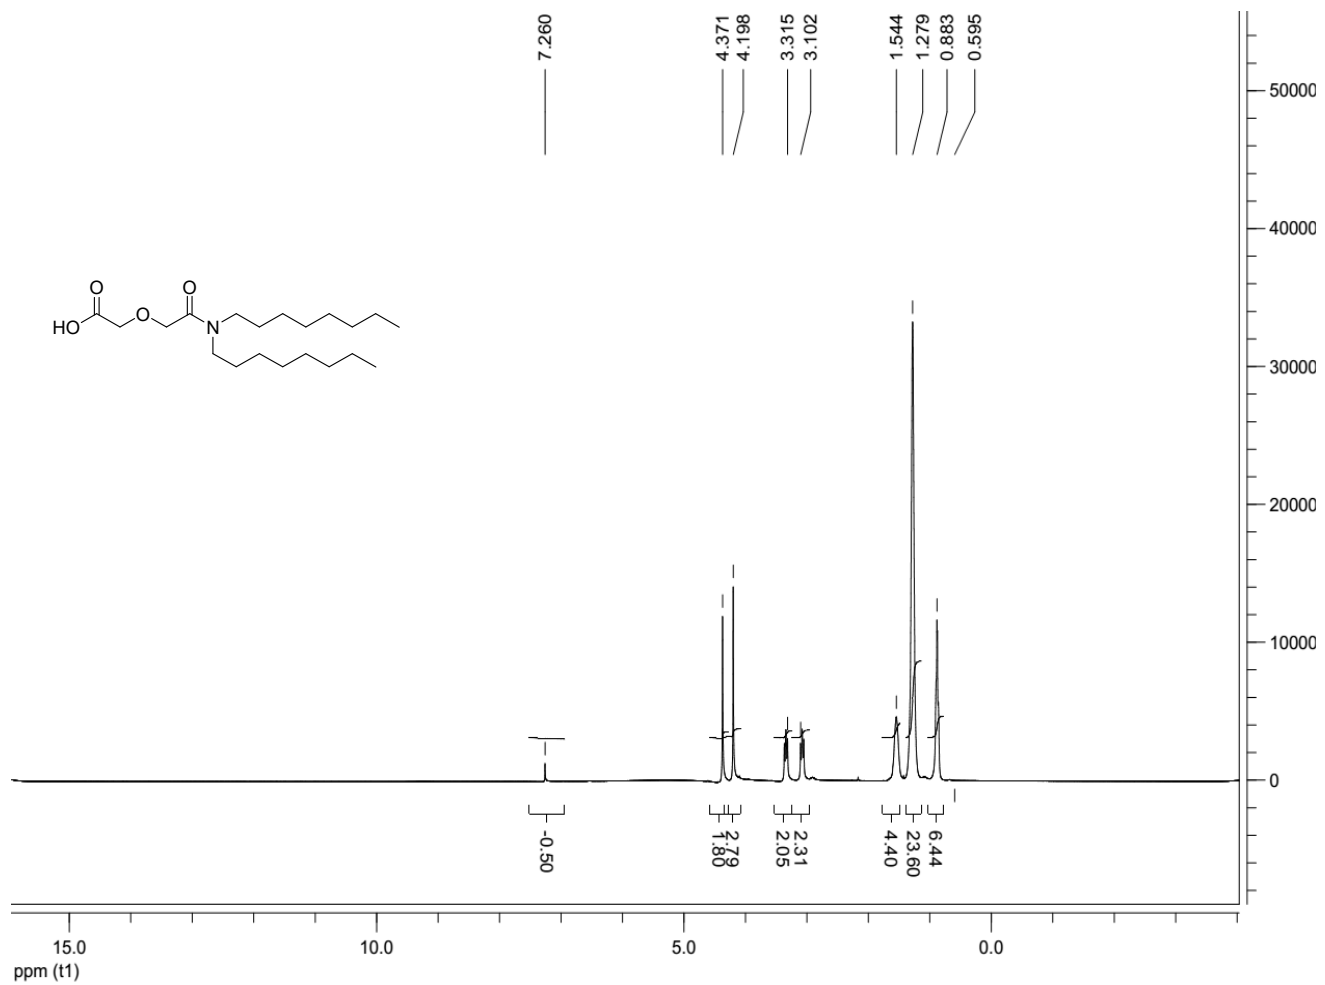

Fig. S2: <sup>1</sup>H-NMR spectra for DGAMA-OCT in CDCl<sub>3</sub>

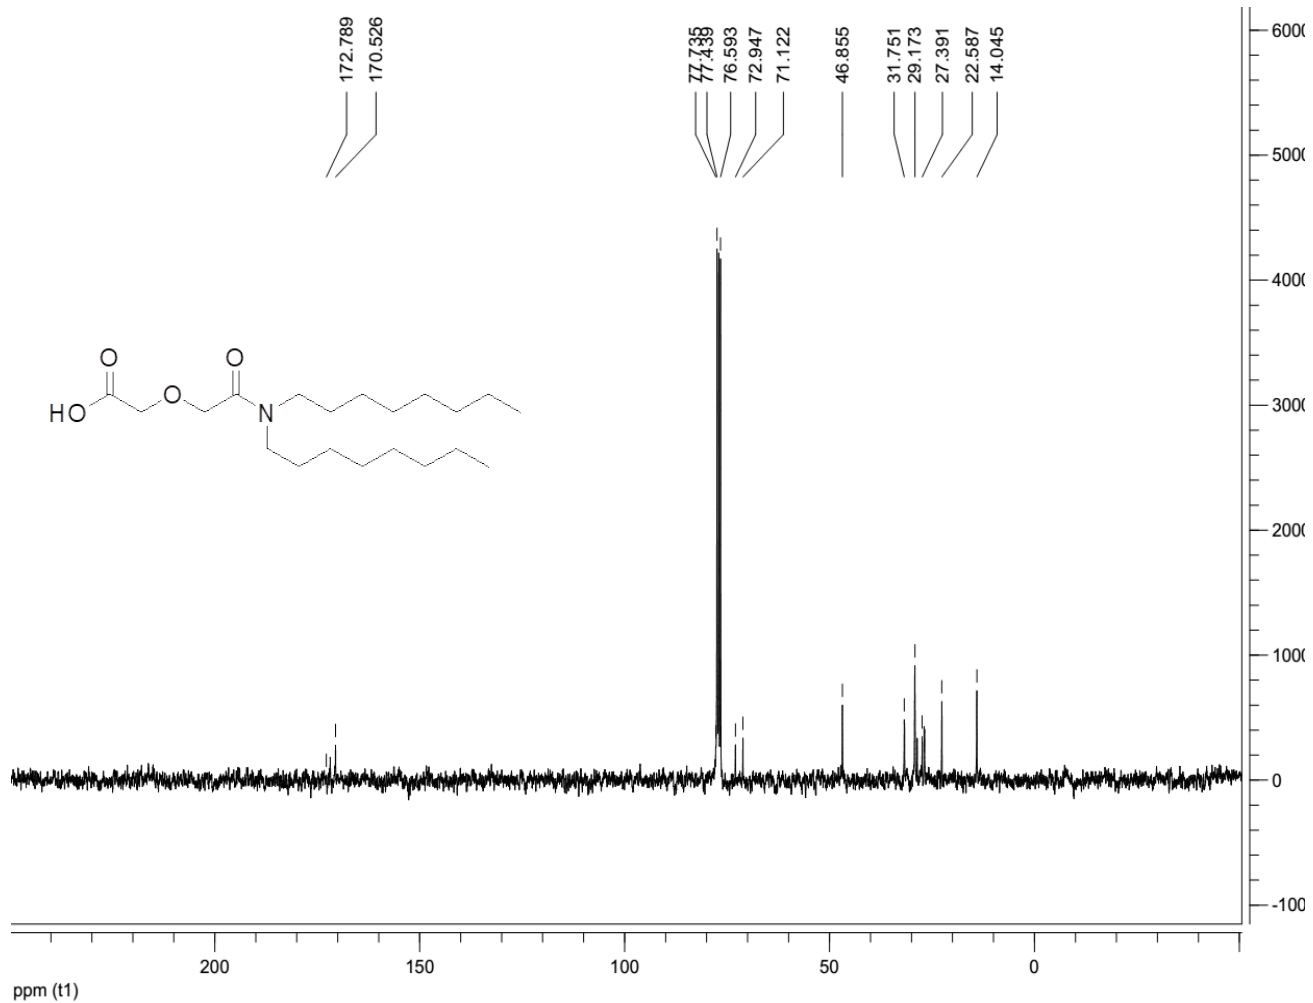

Fig. S3:  $^{13}\text{C}$ -NMR spectra for DGAMA-OCT in  $\text{CDCl}_3$

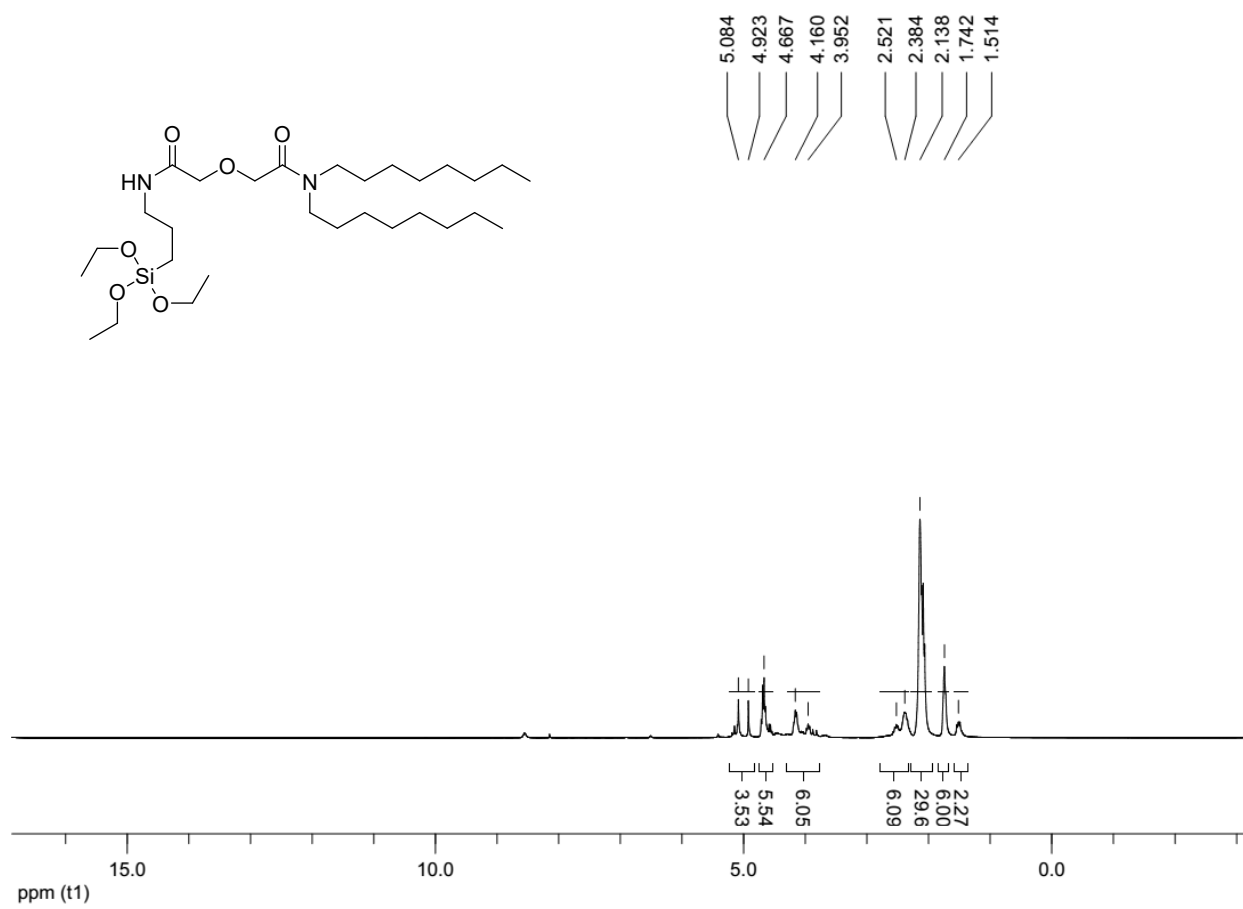

Fig. S4: <sup>1</sup>H-NMR of DGAMA-APTES-OCT in CDCl<sub>3</sub>

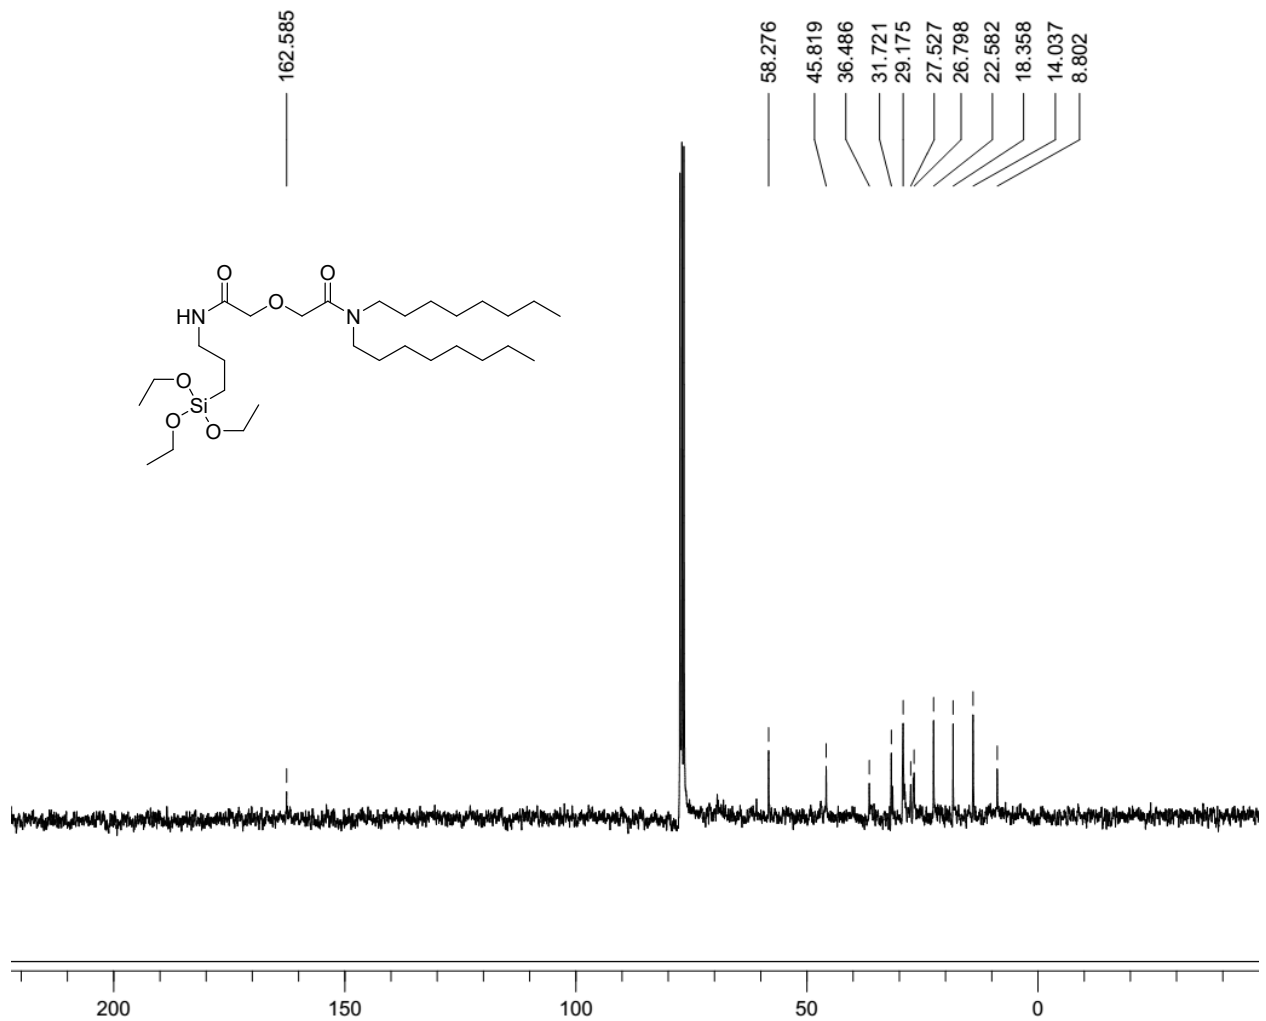

Fig. S5:  $^{13}\text{C}$ -NMR of DGAMA-APTES-OCT in  $\text{CDCl}_3$

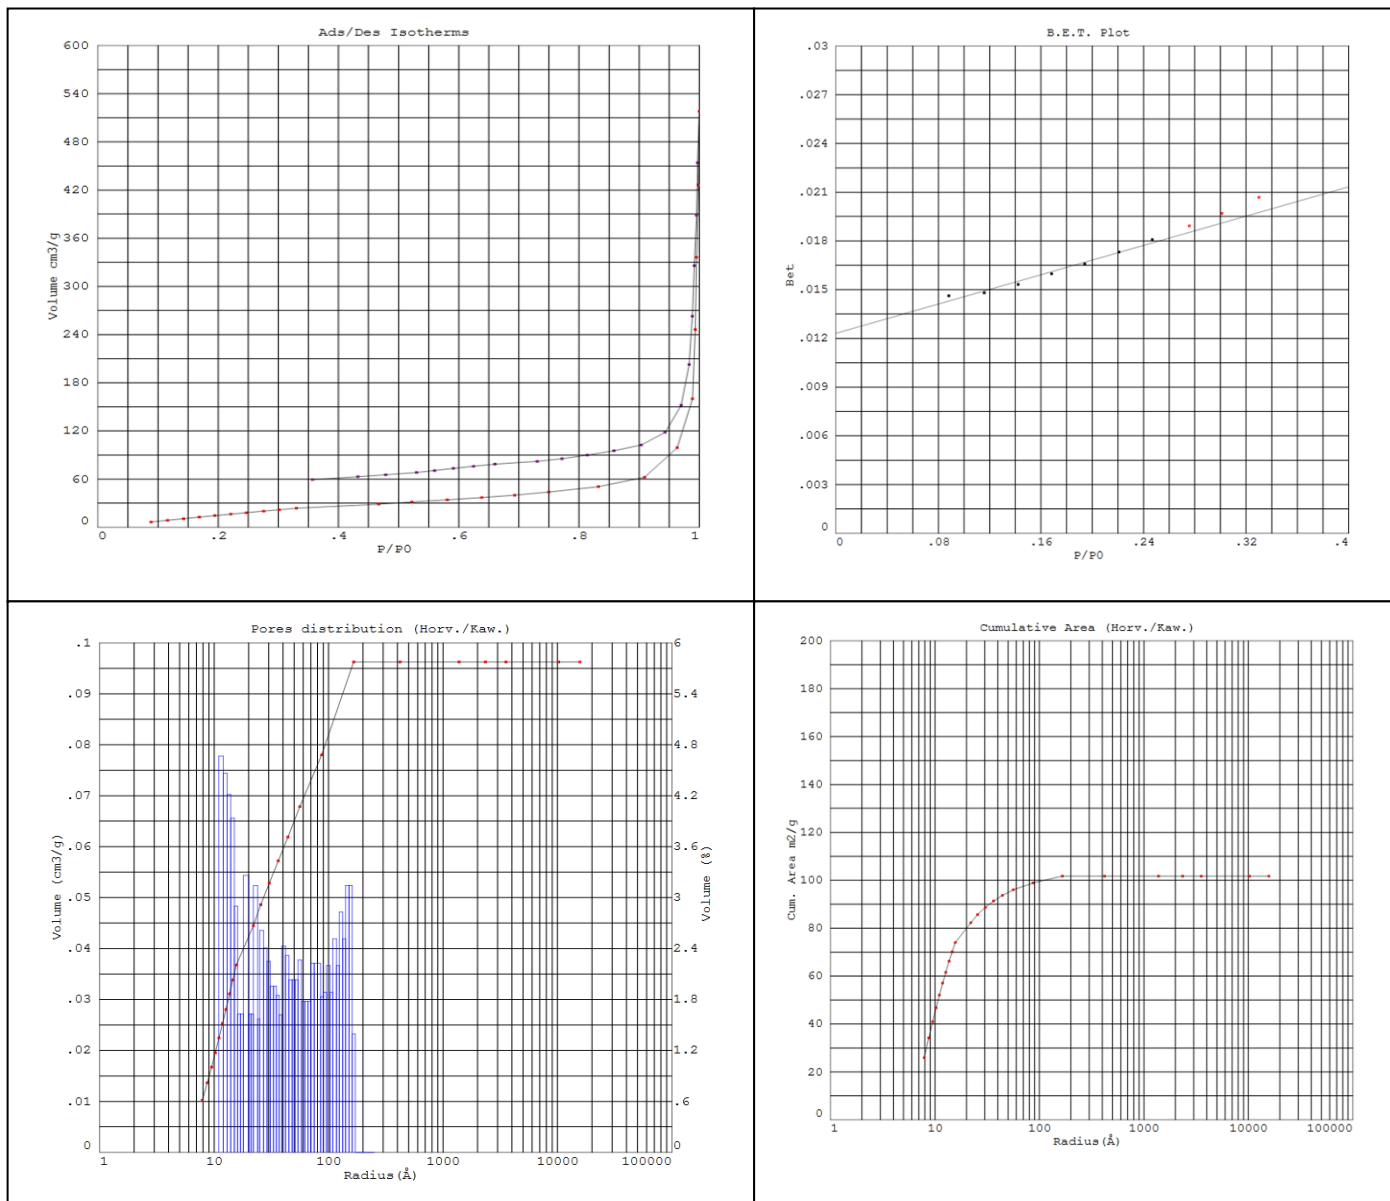

Fig. S6: N<sub>2</sub> adsorption- desorption study and BET analysis for Fe<sub>3</sub>O<sub>4</sub>MNP

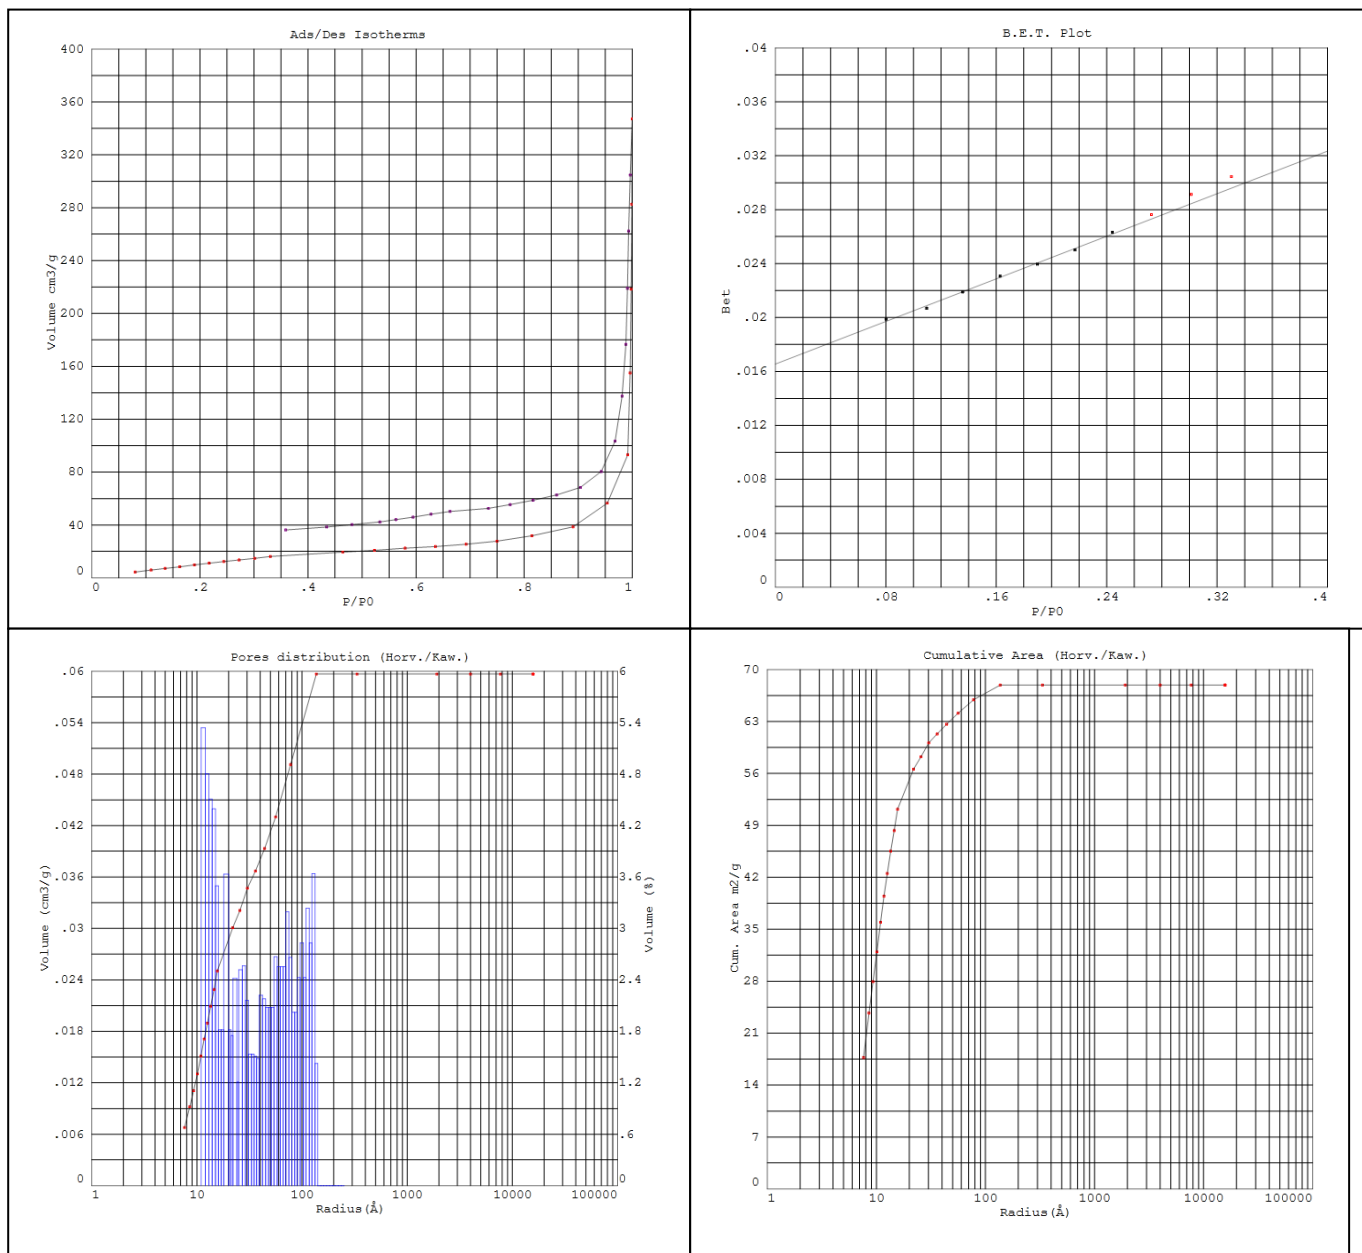

Fig. S7: N<sub>2</sub> adsorption- desorption study and BET analysis for silica coated core shell Fe<sub>3</sub>O<sub>4</sub> MNP

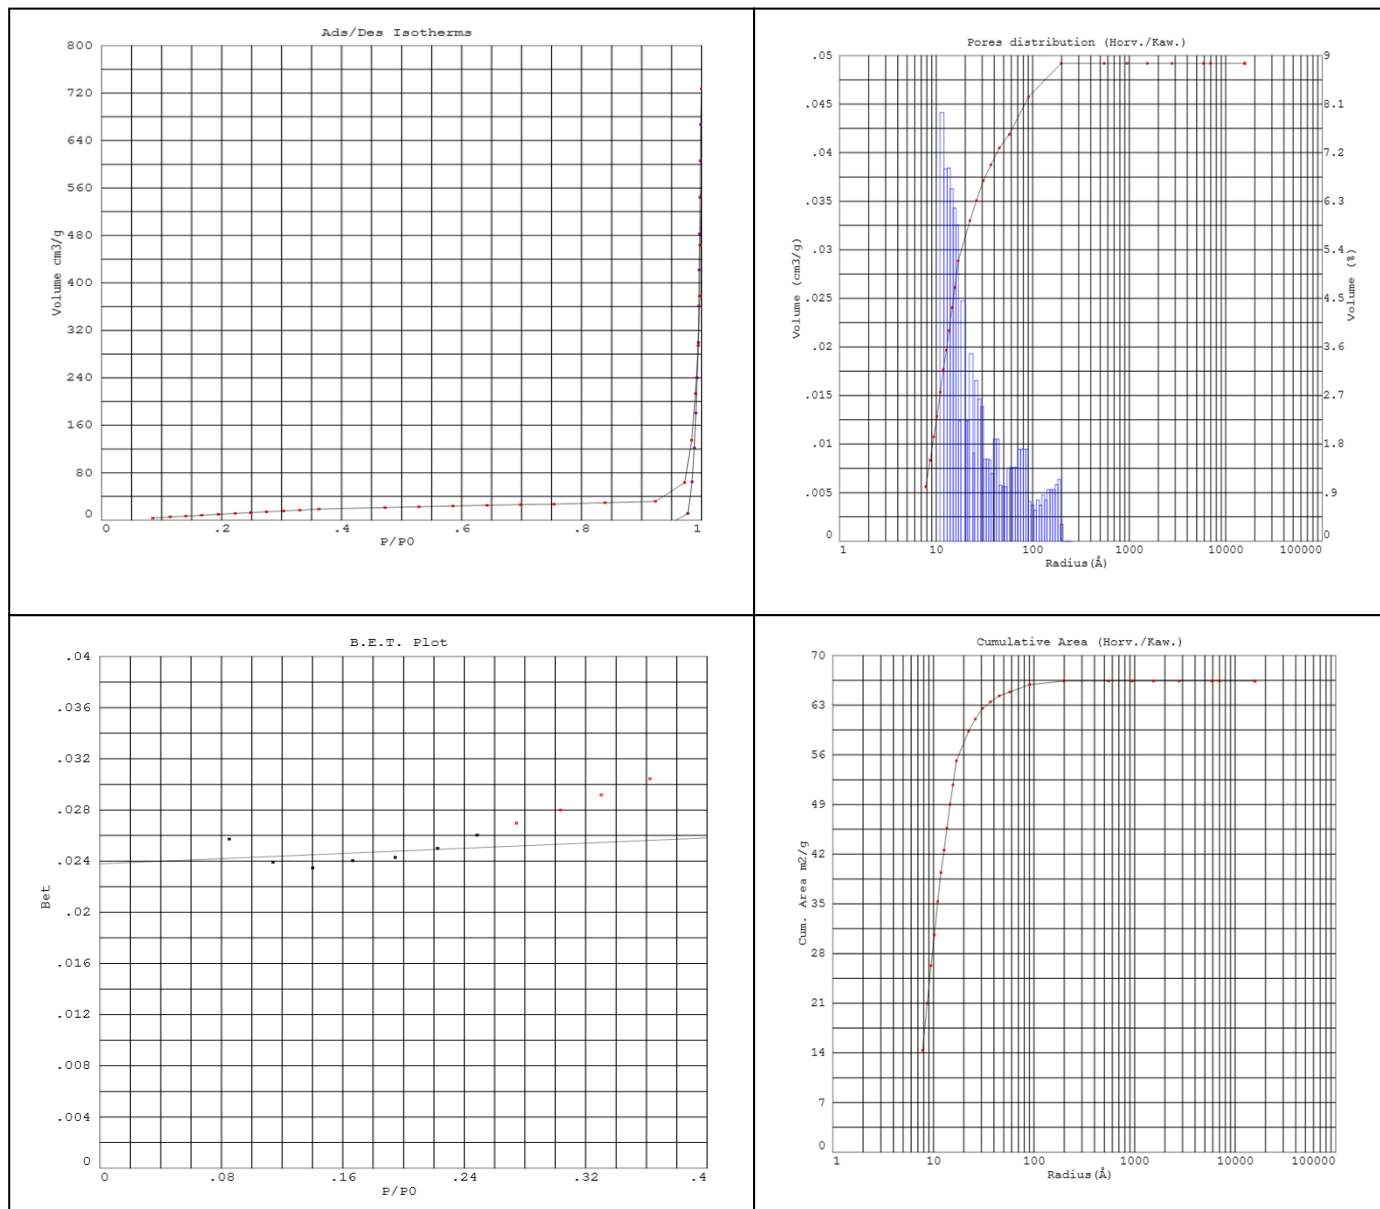

Fig. S8: N<sub>2</sub> adsorption- desorption study and BET analysis for MNSCDGA



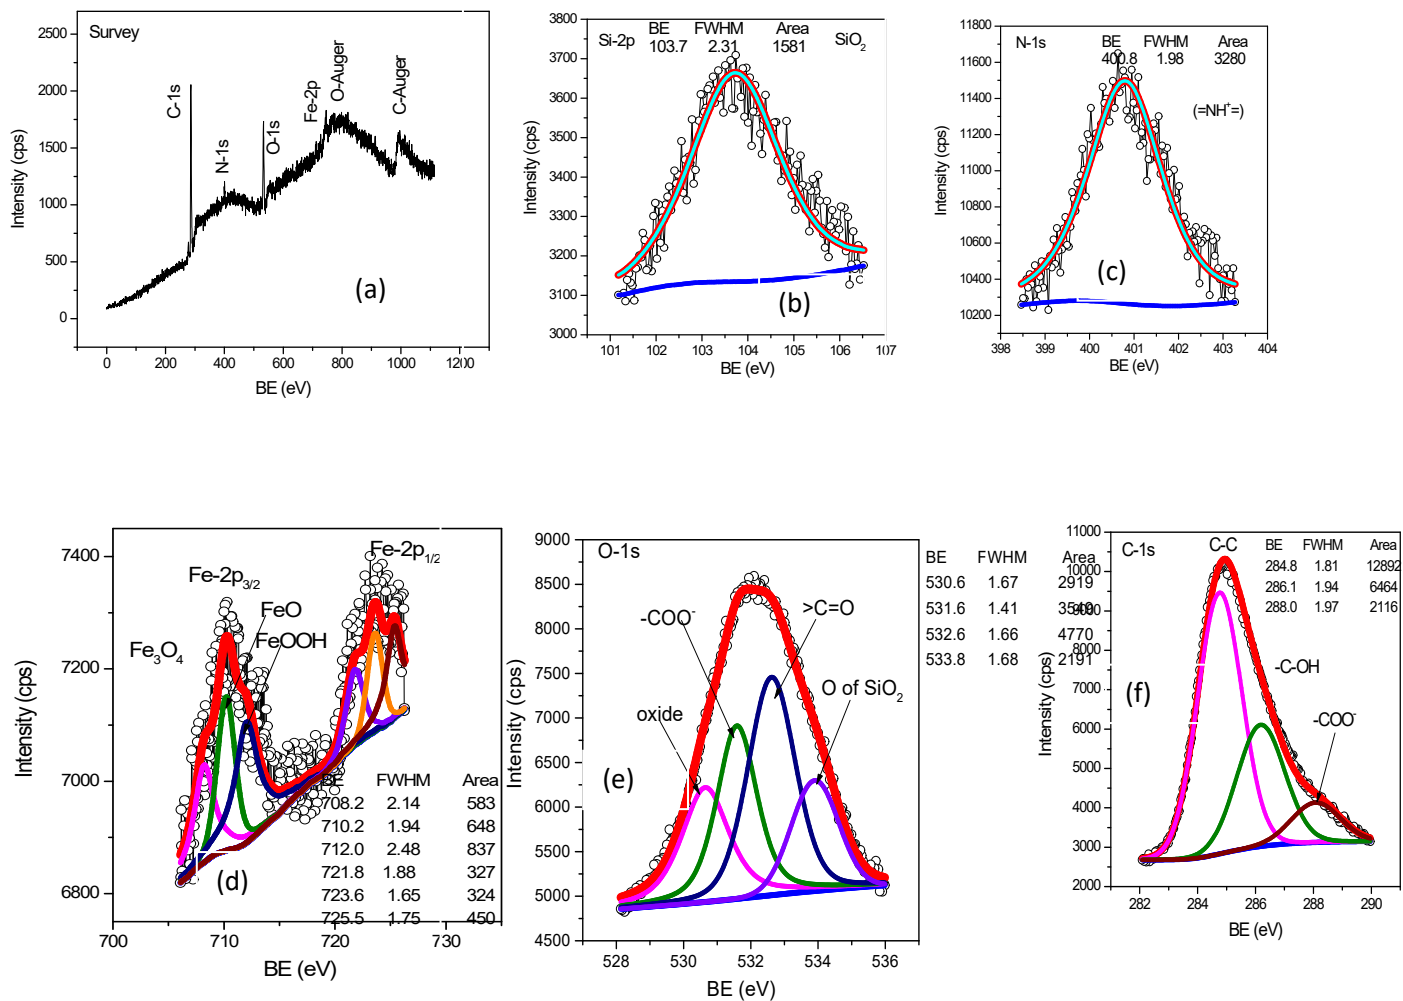

Fig. S9: XPS analysis for DGAMA-APTES-OCT (a) Full spectra in the range of 0-1100 eV; (b) Deconvoluted spectra for Si<sup>2P</sup>; (c) Deconvoluted spectra for N<sup>1s</sup>; (d) Deconvoluted spectra for Fe<sup>2P</sup>; (e) Deconvoluted spectra for O<sup>1s</sup>; (f) Deconvoluted spectra for C<sup>1s</sup>

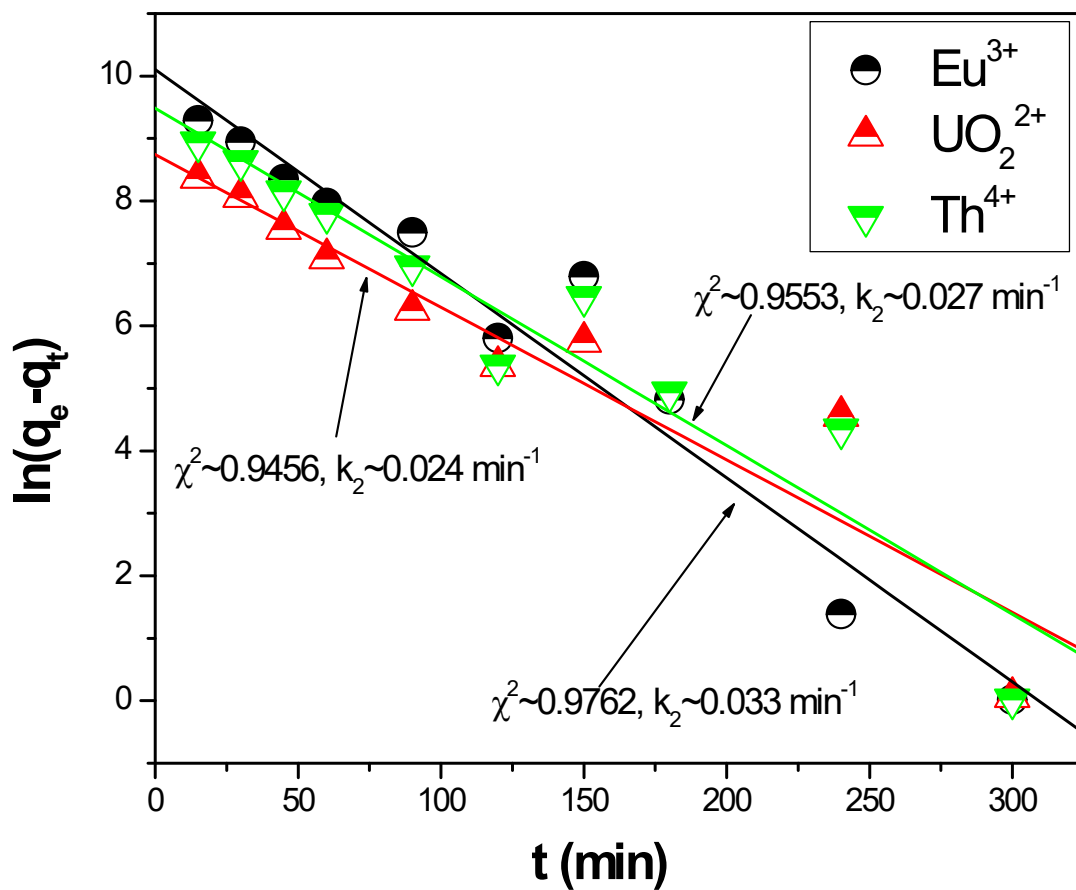

Fig. S10: Linear regression analysis for Lagergren 1<sup>st</sup> order rate kinetics for the sorption of Eu, U and Th

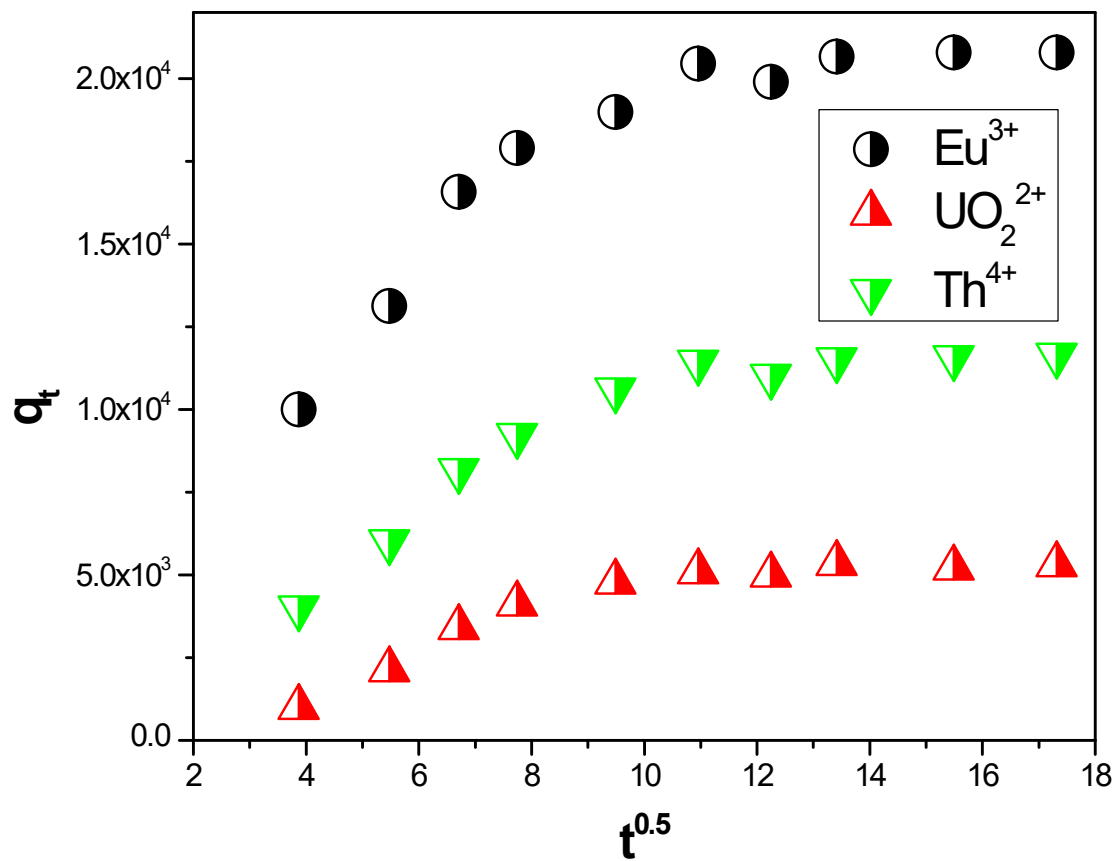

Fig. S11: Linear regression analysis for Intra particle diffusion kinetics for the sorption of Eu, U and Th

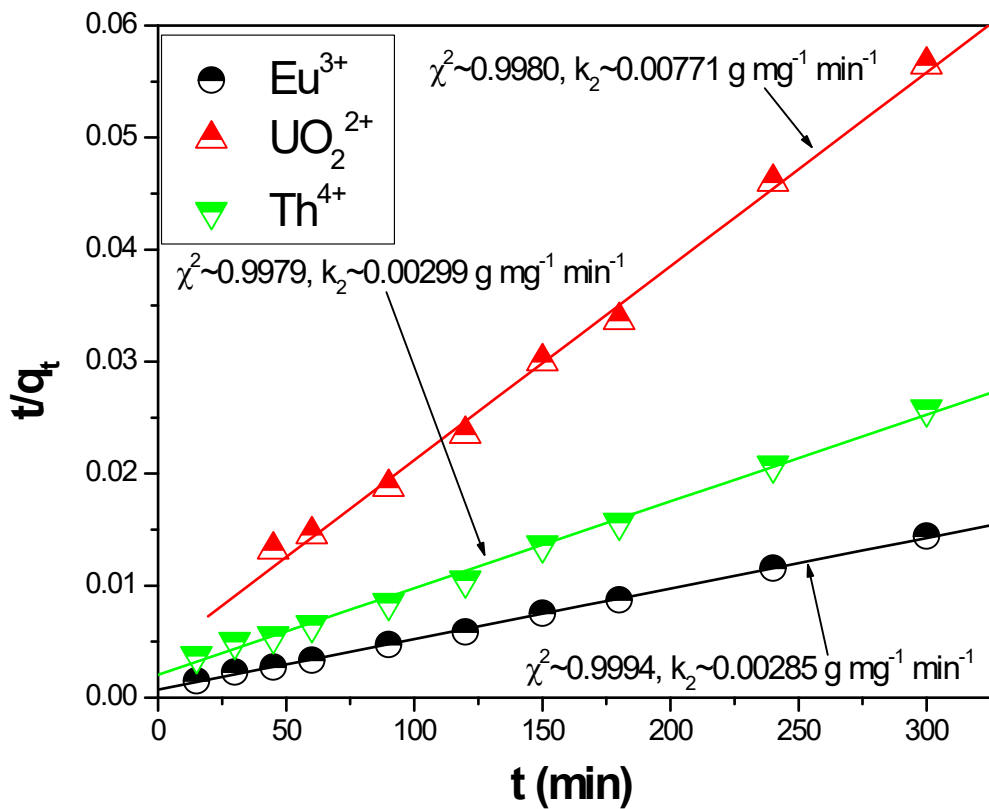

Fig. S12: Linear regression analysis for Pseudo2<sup>nd</sup> order rate kinetics for the sorption of Eu, U and Th

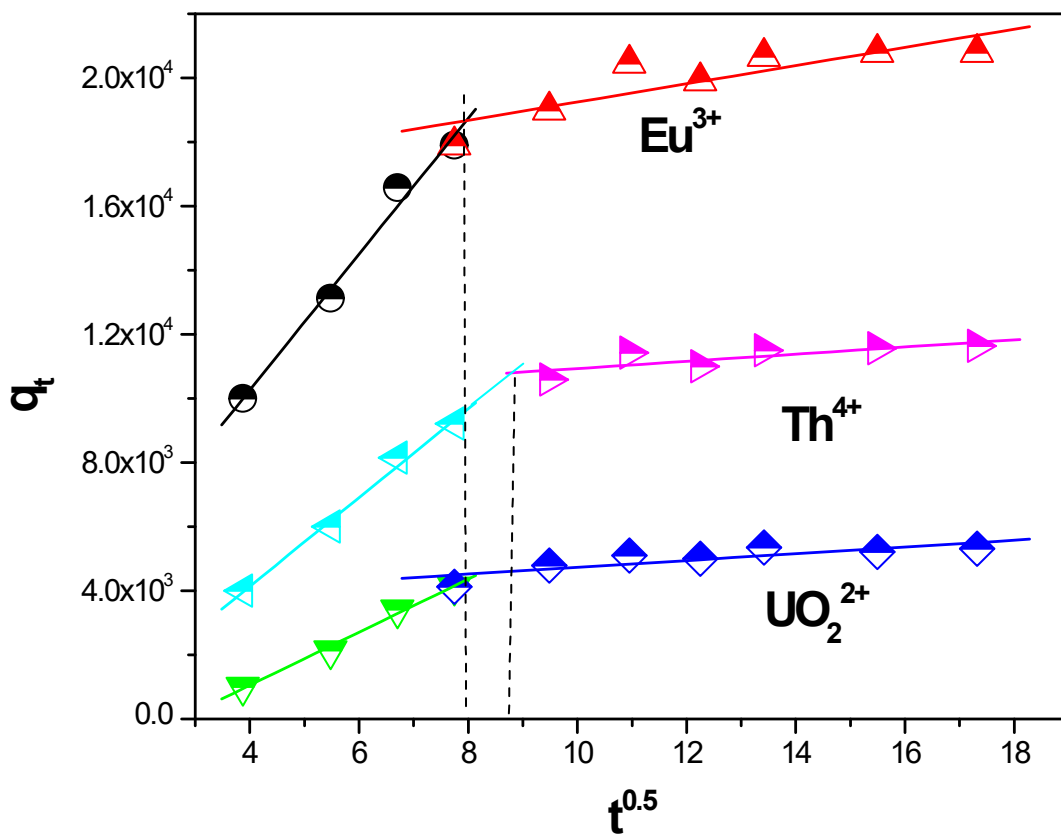

Fig. S13: Linear regression analysis for Weber-Morris model for the sorption of Eu, U and Th

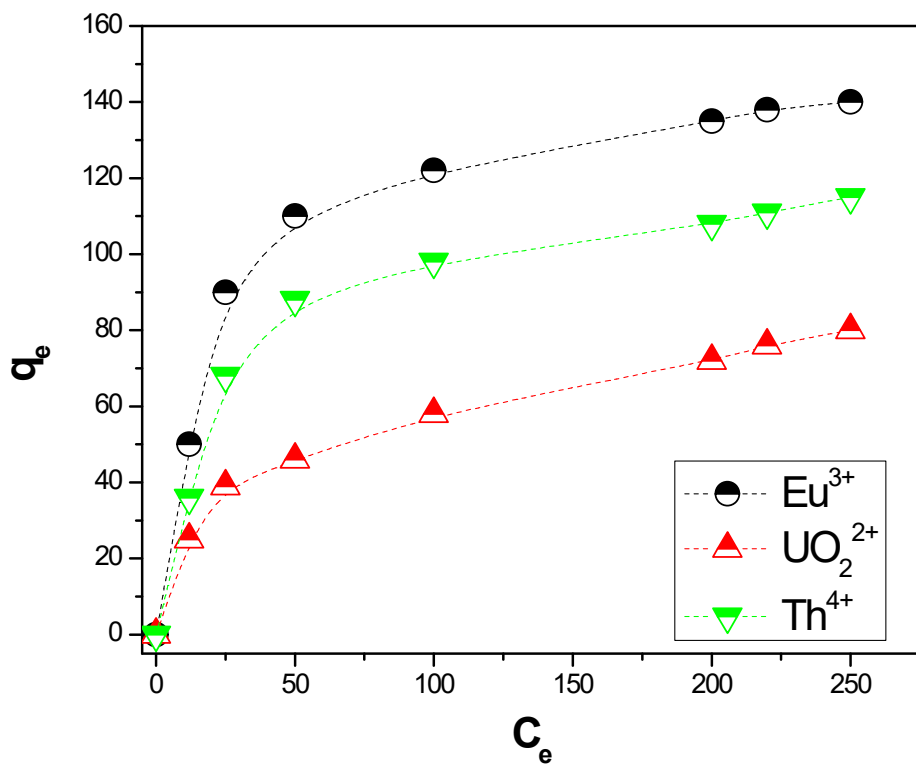

Fig. S14: Non-linear analysis of Langmuir isotherm for the sorption of Eu, U and Th

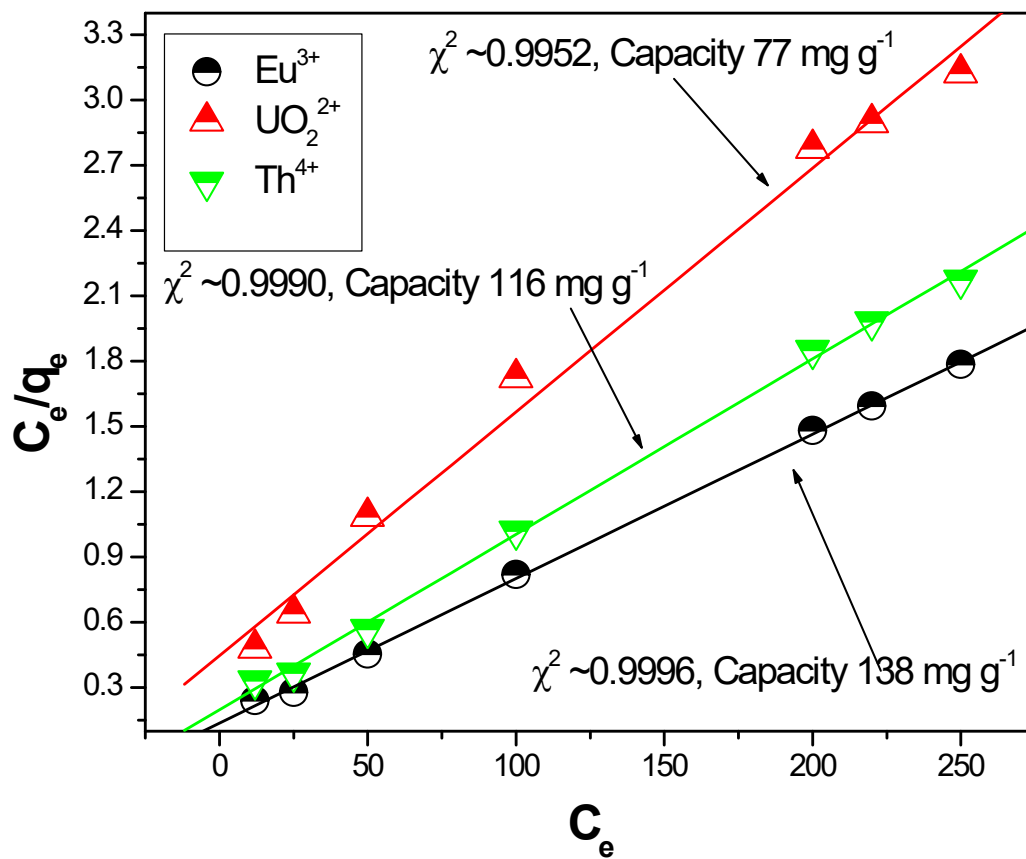

Fig. S15: Linear regression analysis of Langmuir isotherm for the sorption of Eu, U and Th

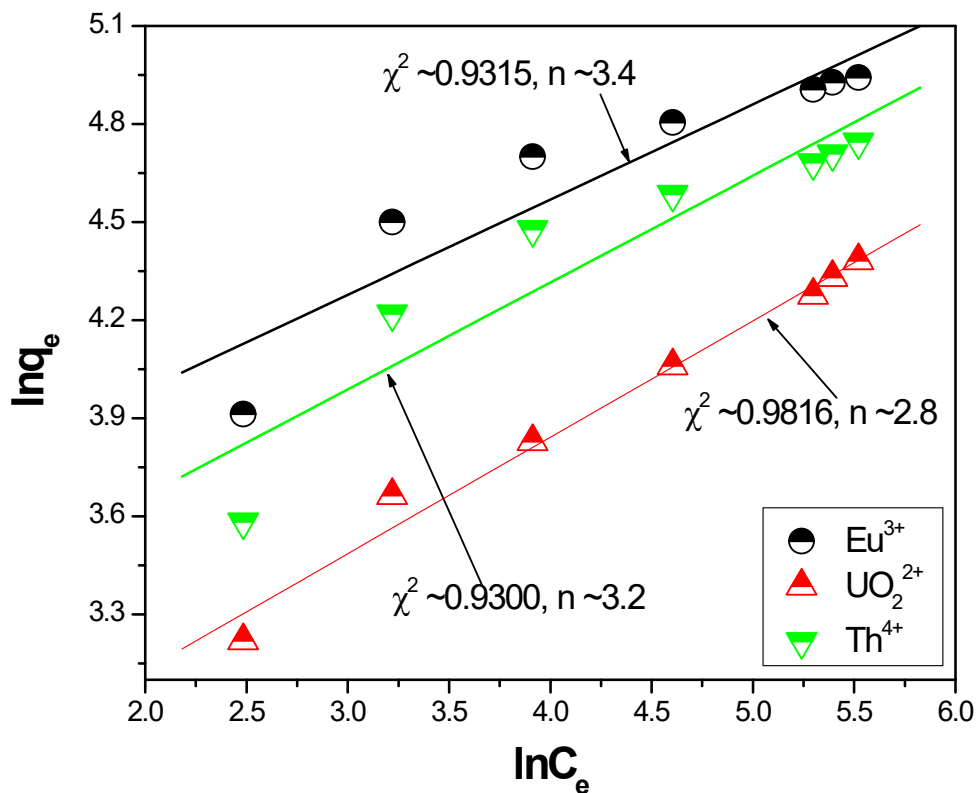

Fig. S16: Linear regression analysis of Freundlich isotherm for the sorption of Eu, U and Th

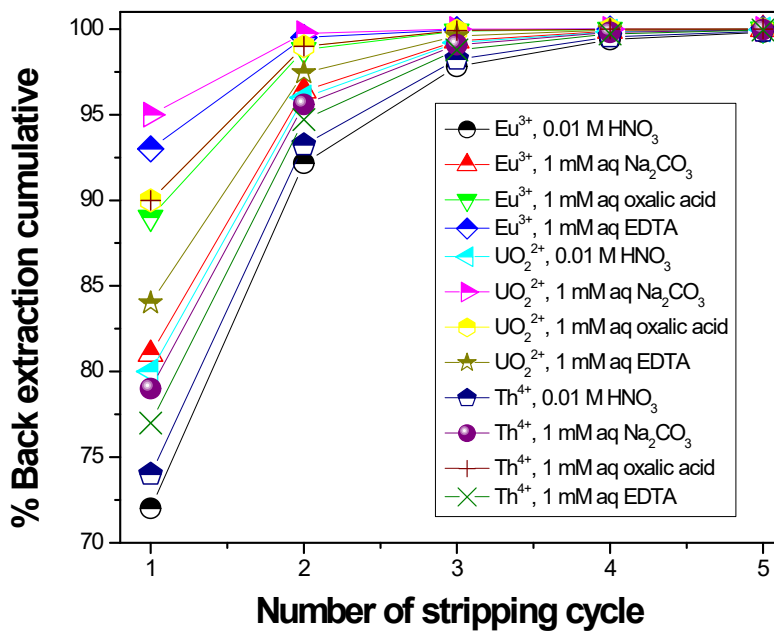

Fig. S17: Cumulative back extraction of f-block cations from loaded solid phase using different aqueous phase complexing agents



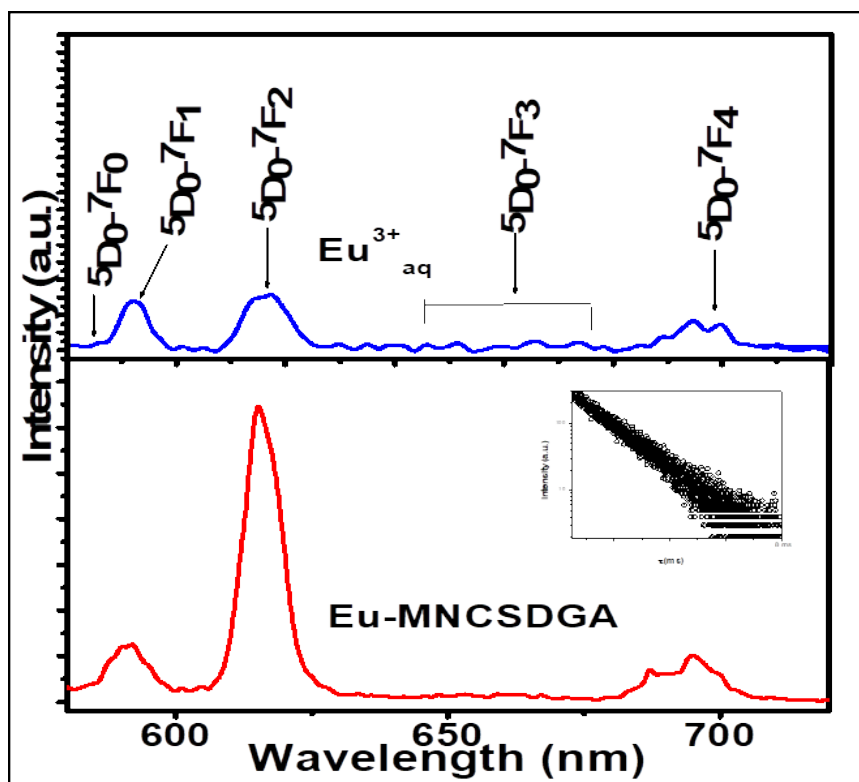

Fig. S18: Luminescence spectra of  $\text{Eu}^{3+}$  aq. & Eu MNCSDGA

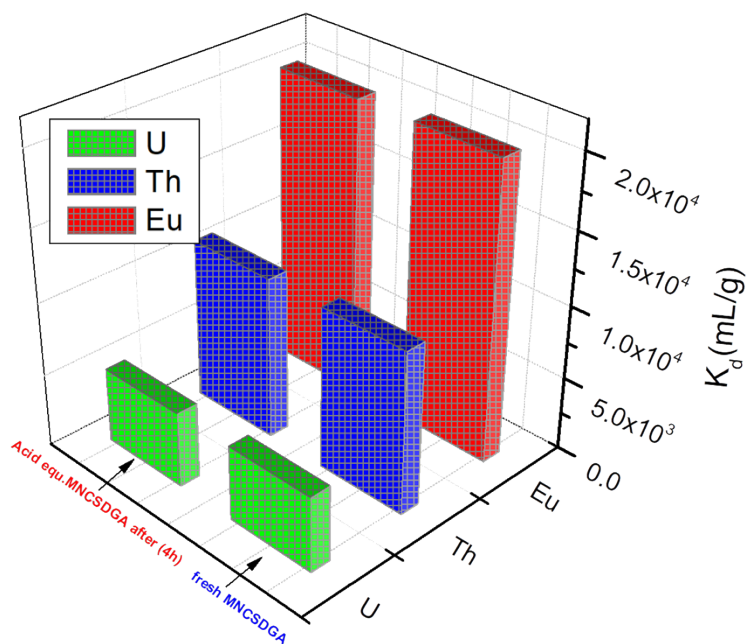

Fig. S19:  $K_d$  (mL/g) values of Eu, Th, & U from 4.0 M  $\text{HNO}_3$  before and after 4h of acid equilibration

Table S1: The separation factor of common metal ions over Eu, U and Th

| Material                                         | Specific surface area (m <sup>2</sup> g <sup>-1</sup> ) | pore specific volume(cm <sup>3</sup> g <sup>-1</sup> ) | maximum pore volume (cm <sup>3</sup> g <sup>-1</sup> ) | C Value BET | Co-relation factor |
|--------------------------------------------------|---------------------------------------------------------|--------------------------------------------------------|--------------------------------------------------------|-------------|--------------------|
| Fe <sub>3</sub> O <sub>4</sub> MNP               | 124.93                                                  | 0.096                                                  | 0.096                                                  | 2.83        | 0.9890             |
| Silica coated Fe <sub>3</sub> O <sub>4</sub> MNP | 77.69                                                   | 0.060                                                  | 0.060                                                  | 3.38        | 0.9983             |
| MNCSDGA                                          | 150.77                                                  | 0.049                                                  | 0.049                                                  | 1.21        | 0.3081             |

Table S2: The separation factor of common metal ions over Eu, U and Th

| Metal ion (X)    | $\beta_{Eu/X}$ | $\beta_{U/X}$ | $\beta_{Th/X}$ |
|------------------|----------------|---------------|----------------|
| Na <sup>+</sup>  | 355.3          | 89.3          | 196.4          |
| K <sup>+</sup>   | 301.5          | 75.8          | 166.6          |
| Ca <sup>2+</sup> | 49.8           | 12.5          | 27.5           |
| Mg <sup>2+</sup> | 43.2           | 10.9          | 23.9           |
| Fe <sup>3+</sup> | 28.43          | 7.1           | 15.7           |
| Cr <sup>3+</sup> | 29.9           | 7.5           | 16.5           |
| Mn <sup>2+</sup> | 46.3           | 11.6          | 25.6           |

Table S3: Comparative picture of sorption behaviour different magnetic materials

| Material                                                              | Sorption capacity (mg/g) |       |      | Operating medium       | Stability in nitric acid | Ref       |
|-----------------------------------------------------------------------|--------------------------|-------|------|------------------------|--------------------------|-----------|
|                                                                       | U                        | Th    | Eu   |                        |                          |           |
| GEMNPs                                                                | 47.28                    | 45.48 | 32.2 | pH                     | No                       | 22        |
| Fe <sub>3</sub> O <sub>4</sub> @SiO <sub>2</sub> /P (TRIM-VPA)        | 60.4                     | *     | *    | 4.0 M HNO <sub>3</sub> | Yes                      | 23        |
| Fe <sub>3</sub> O <sub>4</sub> @C@ASA                                 | 46.2                     | *     | *    | pH                     | No                       | 24        |
| Fe <sub>3</sub> O <sub>4</sub> @MCM-41-PDA/OA                         | 38.11                    | *     | 25.4 | pH                     | No                       | 25        |
| Fe <sub>3</sub> O <sub>4</sub> @MnO <sub>2</sub> hollow spheres       | 13.95                    | *     | *    | pH                     | No                       | 26        |
| Octadecylphosphonic acid bilayer@MnFe <sub>2</sub> O <sub>4</sub> NPs | 1000                     | *     | *    | pH                     | No                       | 27        |
| Oleyl phosphate bilayer@MnFe <sub>2</sub> O <sub>4</sub> NPs          | 1667                     | *     | *    | pH                     | No                       | 27        |
| Phosphated-Fe <sub>3</sub> O <sub>4</sub> NPs                         | 1690                     | *     | *    | pH                     | No                       | 28        |
| Fe <sub>3</sub> O <sub>4</sub> @ZIF-8                                 | 523.5                    | *     | *    | pH                     | No                       | 10a       |
| MNSCDGA                                                               | 77                       | 116   | 138  | 4.0 M HNO <sub>3</sub> | Yes                      | This work |
| *not reported                                                         |                          |       |      |                        |                          |           |

## Equation(s)

- i. Lagergren 1<sup>st</sup> order:  $\ln(q_e - q_t) = \ln q_e - k_1 t$ , Here,  $q_e$  and  $q_t$  (mg/g) are the adsorptive removal capacity at equilibrium and variable time (t), respectively.  $k_1$  is the rate constant
- ii. Pseudo 2nd order:  $\frac{t}{q_t} = \frac{1}{k_2 q_e^2} + \frac{t}{q_e}$ ; Where,  $q_t$  and  $q_e$  are the amount of metal ion adsorbed at equilibrium and at time t,  $k_2$  is the pseudo 2nd order rate constants.
- iii. Intra-particle diffusion kinetics:  $q_t = k_f \sqrt{t} + C$ ;  $k_f$  is the intraparticle diffusion rate constant and C is the intercept
- iv. Langmuir isotherm:  $\frac{C_e}{q_e} = \frac{1}{Q_0 b} + \frac{C_e}{Q_0}$ ; where  $q_e$  (mg/g) and  $C_e$  (mg/L) are the amount of adsorbed metal ion per unit mass of adsorbent and unadsorbed metal ion concentration in solution at equilibrium, respectively.  $Q_0$  (mg/g) is the maximum amount of metal ion per unit mass of sorbent to form a complete monolayer on the surface bound at high  $C_e$  and  $b$  is a constant related to the affinity of the binding sites.
- v. Freundlich Isotherm:  $\log q_e = \log K_f + \frac{1}{n} \log c_e$ ; where  $K_f$  and  $n$  are Freundlich constants;  $K_f$  (mg/g (L/mg)<sup>1/n</sup>) being the sorption capacity of the adsorbent, and  $n$  giving an indication the favorability of the sorption process. Values of  $n > 1$  represent favorable adsorption condition
- vi.  $N_{H_2O} = \frac{1.05}{\tau} - 0.7$ ; where  $N_{H_2O}$ , stands for number of water molecule and lifetime of the luminescence decay
- vii. Asymmetry factor =  $\frac{I_{5D_0 \rightarrow 7F_1}}{I_{5D_0 \rightarrow 7F_2}}$ ; I stands for intensity of respective emission lines.

## Reference:

1. P.P. Barthelemy, G.R. Choppin, Luminescence study of complexation of europium and dicarboxylic acids, *Inorg. Chem.*, 28 (1989) 3354–3357.
2. H. Zheng, D. Liu, Y. Zheng, S. Liang, Z. Liu, Sorption isotherm and kinetic modeling of aniline on Cr-b entonite, *J. Hazard. Mater.*, 167 (20 09) 141–147.
